# Supplementary material for: Efficient degradation of orange G dye using the quartz-sand@polythiophene composite for peroxymonosulfate activation: a sustainable approach for advanced oxidation processes
Source: Royal Society of Chemistry journal article supplement (doi:10.1039/d3ma00596h), 2023-12-11
Supplement: d3ma00596h1.pdf [file d3ma00596h1.pdf]

## Supplementary information

# Efficient degradation of Orange G dye using Quartz-Sand@Polythiophene composite for Peroxymonosulfate Activation: A sustainable approach for advanced oxidation processes

Asma Amjlef<sup>1\*</sup>, Abdellah Ait El Fakir<sup>1</sup>, Salaheddine Farsad<sup>1</sup>, Aboubakr Ben Hamou<sup>1</sup>,  
Ayoub Chaoui<sup>1</sup>, Saïd Et-Taleb<sup>1\*</sup>, Noureddine El Alem<sup>1</sup>

<sup>1</sup> Laboratory of Materials and Environment, Faculty of Sciences, Ibn Zohr University, Agadir, Morocco.

\*Corresponding author: [amjlef.asma@gmail.com](mailto:amjlef.asma@gmail.com); [said.ke.ettaleb@gmail.com](mailto:said.ke.ettaleb@gmail.com).

### Text S1: Chemical reagent

The quartz sand used in this work was sourced from the southern of Morocco (Assa region). The QS was collected, crushed, and sieved to a particle size of 70µm. Subsequently, it underwent a cleaning process with distilled water and was then dried at a temperature of 60°C.

Thiophene (C<sub>4</sub>H<sub>4</sub>S, 99%), Chloroform (CHCl<sub>3</sub>), anhydrous iron chloride (FeCl<sub>3</sub>), Acetone (C<sub>3</sub>H<sub>6</sub>O), Sodium hydroxide (NaOH, 98%), Hydrochloric acid (HCl, 35%), Orange G, Tert-butanol ((CH<sub>3</sub>)<sub>3</sub>COH, 99.5%), Ethanol (C<sub>2</sub>H<sub>5</sub>OH, 99.8%), P-benzoquinone (C<sub>6</sub>H<sub>4</sub>(=O)<sub>2</sub>, 98%), L-Histidine (C<sub>6</sub>H<sub>9</sub>N<sub>3</sub>O<sub>2</sub>, 99%) were obtained from Sigma Aldrich (St. Louis, MO, USA).

### Text S2: Characterization

Surface chemistry of QS, and QS@Ch-Glu before and after adsorption was carried out by Fourier-transform infrared spectra (FTIR) using a Shimadzu spectrometer equipped with a Jasco ATR PRO ONE module, the spectra were scanned at resolution of 16 cm<sup>-1</sup>. Structural characterization of QS, and QS@Ch-Glu was carried out by X-ray diffraction (XRD) (Bruker D8 Advance Twin, λ(KαCu) = 1.5418 Å radiation, at voltage of 40 kV and current of 40 mA). Surface morphology and elemental content of QS, and QS@Ch-Glu before and after adsorption were observed using scanning electron microscopy (SEM) coupled with energy dispersive X-ray spectrometry (EDS) analysis (SEM,

JEOL, JSM-IT200). Radicals generated during the PMS activation process were detected on an electron paramagnetic resonance (EPR) spectrometer (EMX-plus X-band spectrometer (Bruker)).

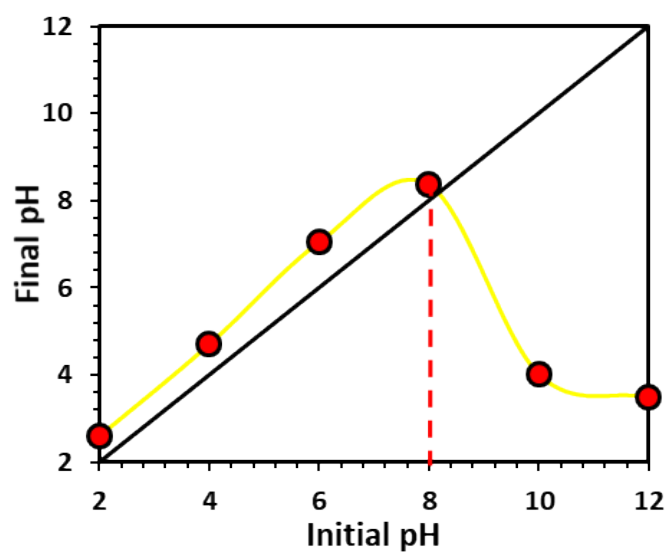

Fig. S1: The pH<sub>pzc</sub> of QS@PTh.

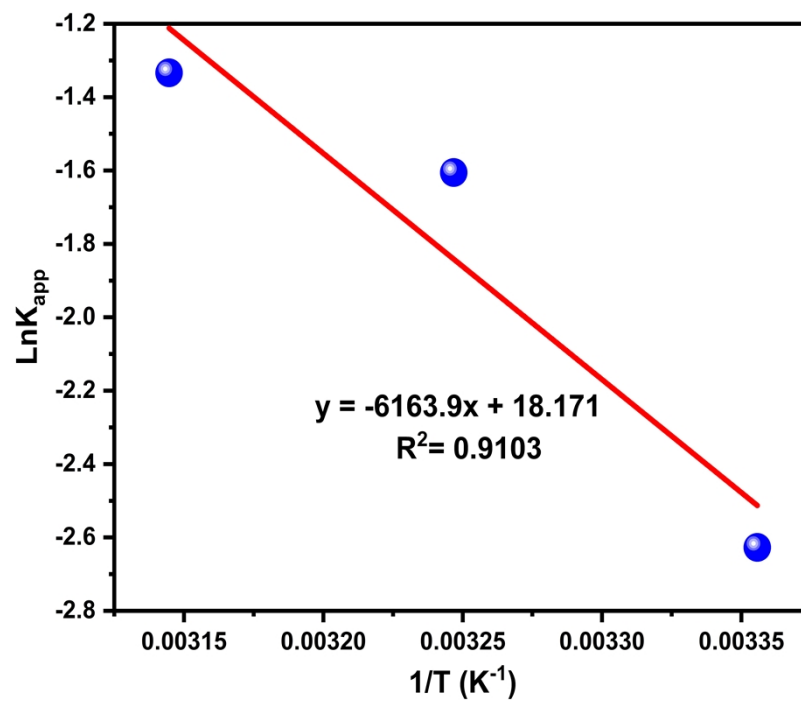

Fig. S2: Arrhenius plot for the OG dégradation using QS@PTh as acatalyst for PMS activation.
